# Supplementary material
Source: publisher site journal article supplement (https://www.dovepress.com/get_supplementary_file.php?f=299678.docx)
Supplement: Supplementary file 1 [file get_supplementary_file.php]

**Supplementary Information**

**Preparation and identification of 6’,7’-epoxyauraptene**

***Method:***

Cold-pressed essential oil of Liangping pomelo was rotary-evaporated in a 65°C water bath to obtain the non-volatile residue. A hundred milligram of the residue were dissolved in a 1 mL mixture of dichloromethane and methanol (27/73, v/v) and subjected to ten consecutive injections into a preparative-LC system (Hanbon Science & Technology Co., Ltd, Jiangsu, China) equipped with two NP7005C pumps and an NU3000C dual-wavelength UV-Vis detector. Preparative analyses were carried out on an Agilent Zorbax SB-C18 column (250 mm × 9.4 mm i.d., 5 µm). Mobile phase and solvent gradient were adapted to the method described by Dugo *et al*. 1 Briefly, solvent A consisted of water/methanol/THF (85:10:5) and solvent B consisted of methanol/THF (95:5). The step-wise gradient profile was as follows: 0–5 min, 0% B, 5–25 min, 0–40% B, 25–45 min, 40–90% B, 45–55 min, 90% B, 55-60 min, 0% B. Flow-rate was 3.0 mL/min. UV responses were acquired using the UV-Vis detector at 323 and 258 nm simultaneously, and the peak eluted around 35 min with a response ratio of approximate 9:1 at 323 nm to 258 nm was manually collected. Ten eluents were combined and dried under nitrogen flow at 40°C.

A Thermo Ultimate 3000 HPLC employed with a PDA detector and a Thermo Quantiva triple quadrupole electrospray ionization tandem mass spectrometer was used to check peak purity and obtain precursor/fragment ion mass information. A Phenomenex Germini (150 × 3mm i.d., 3 μm) HPLC column was used with the following mobile phase: 0.1% aqueous formic acid (A) and 0.1% formic acid in acetonitrile (B). The solvent gradient was as follows: 0–5 min, 50% B; 5–25 min, 50–80% B; 25–27 min, 80–95% B; 27–30 min, 95% B; 30–32 min, 95–50%, B; 32–36 min, 50% B. The PDA was set to scan from 190 to 400 nm. The triple quad MS was set to operate in the positive ion mode at 3500 V. Other conditions were as follows: sheath gas (Arb): 45, Aux gas (Arb): 20, Sweep gas (Arb):1, CID gas (mTorr): 1.5, Ion transfer tube temp: 325°C, Vaporizer temp: 275°C.

The structure was confirmed by 1H-NMR and 13C-NMR spectra collected in CDCl3 using a Varian Infinity plus 400 (Palo Alto, CA, USA). Both spectra were acquired at room temperature.

***Results:***

5.3 mg of yellowish-white powder was obtained from prep-LC separation. Purity of the powder was roughly determined to be approximate 92% using UV peak area normalization method. By MS-MS detection, the precursor ion was identified as 337.3 [M+Na]+, and the major product ion was identified as 185.2 [M+2H-C10H18O+Na]+. The m/z of the molecular ion was 314.4. Proposed ionization mechanism is shown as below:

MW 314

m/z 337

m/z 185

NMR spectra further confirmed the proposed structure of the compound. 6’,7’-epoxyauraptene, (5-(3,3-dimethyloxiran-2-yl)-3-methylpent-2-enyloxy)-2H -chromen-2-one: 1H-NMR (400 MHz, CDCl3) δ: 1.29 (3H, s), 1.27 (3H, s), 1.78 (3H, s), 4.62 (2H, d, J=6.2Hz), 2.24 (2H, m), 1.68 (2H, m), 5.52 (1H, t, J=7.2 Hz), 2.72 (1H, t, J=6.0Hz), 6.24 (1H, d, J=9.6Hz), 7.65 (1H, d, J=9.6 Hz), 7.37(1H, d, J= 8.8 Hz), 6.87 (1H, dd, J=2.4, 8.4), 6.81 (1H, d, J=2.8). 13C-NMR (100 MHz, CDCl3) δ: 16.8, 18.6, 24.8, 27.1, 36.2, 58.3, 63.8, 65.3, 101.5, 112.4, 112.8, 113.1, 119.0, 128.7, 141.6, 143.4, 155.8, 161.3, 162.0.

***References:***

1. P. Dugo, M. Russo, M. Saro, C. Carnovale, I. Bonaccorsi and L. Mondello, *JOURNAL OF SEPARATION SCIENCE*, 2012, **35**, 1828-1836.

**Table S1.** Recovery of the 16 OHCs in essential oils of Liangping pomelo

| **No** | **Name** | **CPEO** | |  | **DEO** | |
| --- | --- | --- | --- | --- | --- | --- |
| Concentration spiked (μmol L-1)1 | Recovery rate (%) | Concentration spiked (μmol L-1)1 | Recovery rate (%) |
| 1 | meranzin hydrate | 20 | 92.9±6.1 |  | 1.0 3 | 86.1±5.3 4 |
| 2 | auraptenol | 60 | 89.6±1.1 |  | 1.0 3 | 91.5±3.7 4 |
| 3 | meranzin | 2000 | 97.5±2.3 |  | 4.0 | 99.1±3.3 |
| 4 | isomeranzin | 300 | 98.8±7.7 |  | 1.0 | 80.7±7.0 |
| 5 | oxypeucedanin | 400 | 105.4±1.0 |  | 1.0 | 95.0±6.0 |
| 6 | nobiletin | 10 2 | 94.3±4.3 |  | 1.0 3 | 92.2±2.1 5 |
| 7 | heptamethoxyflavone | 10 2 | 100.3±5.4 |  | 1.0 3 | 87.6±9.4 5 |
| 8 | 6’,7’-DHB | 10 | 90.9±6.6 |  | 1.0 3 | 110.3±10.1 |
| 9 | tangeretin | 10 2 | 94.5±7.9 |  | 1.0 3 | 93.4±3.5 5 |
| 10 | imperatorin | 30 | 93.1±3.8 |  | 1.0 3 | 118.7±9.7 5 |
| 11 | epoxyauraptene | 600 | 95.8±5.9 |  | 1.0 | 82.7±5.7 |
| 12 | osthole | 200 | 101.7±4.6 |  | 1.0 3 | 84.1±2.3 |
| 13 | isoimperatorin | 1300 | 103.0±7.3 |  | 2.5 | 94.2±8.1 |
| 14 | epoxybergamottin | 250 | 98.2±5.8 |  | 1.0 | 106.9±3.1 |
| 15 | 8-GOP | 10 | 96.1±3.4 |  | 1.0 3 | 93.0±1.6 5 |
| 16 | auraptene | 500 | 102.5±6.3 |  | 1.0 | 91.4±2.6 |

1 Spiked concentration was chosen close to each original concentration in samples; except for those compounds not detected/quantitated, a 2 high level (10 μmol L-1) or 3 low level (1 μmol L-1) of standards were added to CPEO and DEO, respectively. 4 Quantitated using fluorescence only. 5 Quantitated using UV only.
